# Supplementary material for: Self-Assembly of Short Elastin-like Amphiphilic Peptides: Effects of Temperature, Molecular Hydrophobicity and Charge Distribution
Source: MDPI journal article supplement (doi:10.3390/molecules24010202), 2019-01-08
Supplement: s1 [file s1]

**Supporting Information for**  
**Self-Assembly of Short Elastin-like Amphiphilic Peptides: Effects of**  
**Temperature, Molecular Hydrophobicity and Charge Distribution**

Meiwen Cao,<sup>\*,1</sup> Yang Shen,<sup>1</sup> Yu Wang,<sup>1</sup> Xiaoling Wang,<sup>2</sup> Dongxiang Li<sup>3</sup>

<sup>1</sup> *State Key Laboratory of Heavy Oil Processing and Centre for Bioengineering and Biotechnology, China University of Petroleum (East China), 66 Changjiang West Road, Qingdao Economic Development Zone, Qingdao 266555, China*

<sup>2</sup> *Qingdao Vocational and Technical College, Qingdao Economic and Technological Development Zone, Qingdao, P. R. China*

<sup>3</sup> *Shandong Key Laboratory of Biochemical Analysis; College of Chemistry and Molecular Engineering, Qingdao University of Science and Technology, Qingdao 266042, PR China*

*\*Corresponding authors: phone & fax: 86-532-86983455, email: mwcao@upc.edu.cn*

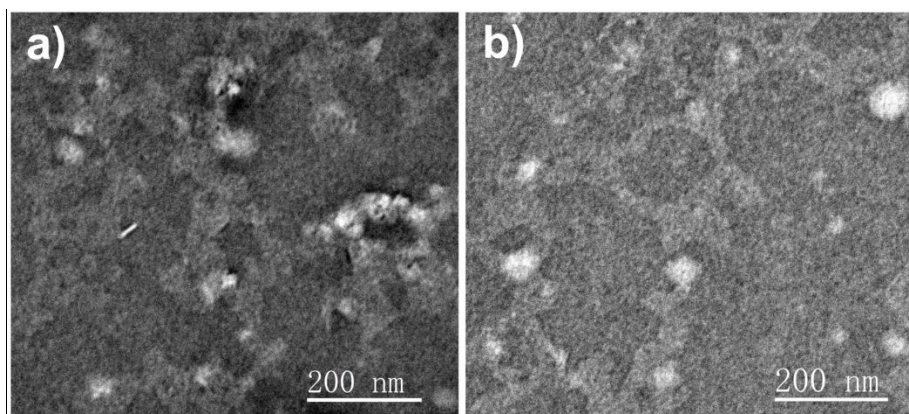

**Figure S1.** TEM morphologies show the aggregate structures of peptides IK-K8 (left) and IKK8 (right) at concentration of 4.0 mM and temperature of either 20 °C.

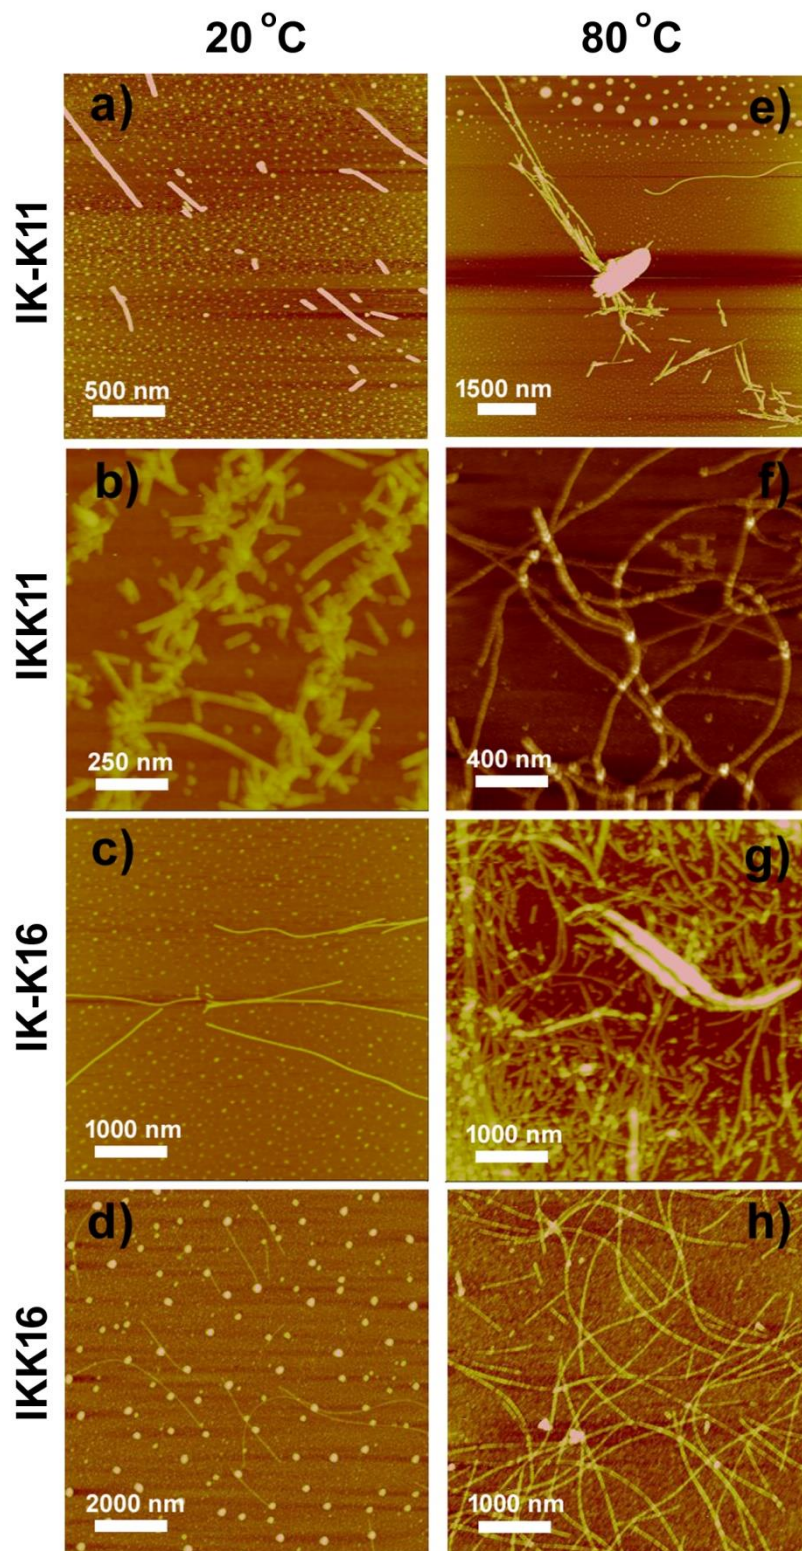

**Figure S2.** AFM morphologies show the self-assembled structures of different peptides at concentration of 4.0 mM and temperature of either 20 °C or 80 °C.

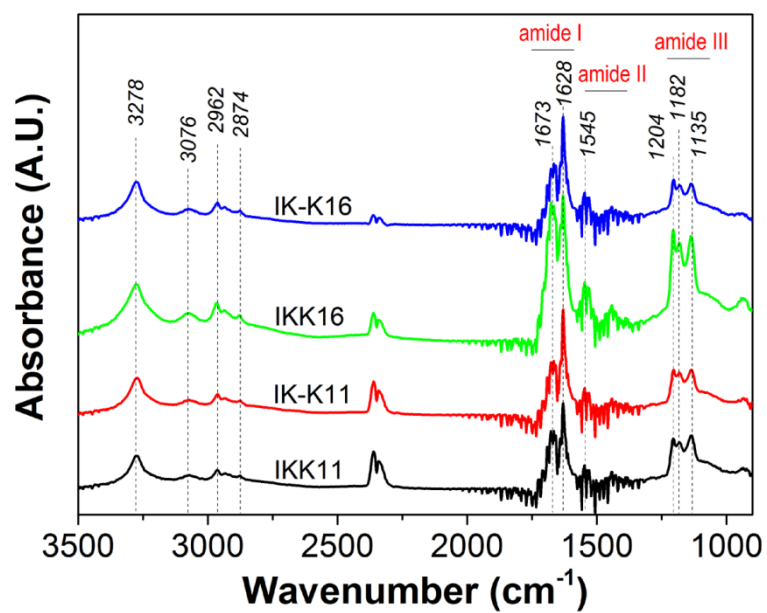

**Figure S3.** The FTIR spectra of different peptide solutions at concentration of 4.0 mM and temperature of 20 °C.
